# Supplementary material for: Monitoring thermally induced structural deformation and framework decomposition of ZIF-8 through in situ temperature dependent measurements
Source: Royal Society of Chemistry journal article supplement (doi:10.1039/c7cp04694d), 2017-01-01
Supplement: c7cp04694d1.pdf [file c7cp04694d1.pdf]

## Supporting Information

### **Monitoring thermally induced structural deformation and framework decomposition of ZIF-8 through *in-situ* temperature dependent measurements**

Ben Xu, Yingjie Mei, Zhenyu Xiao, Zixi Kang, Rongming Wang, Daofeng Sun\*  
State Key Laboratory of Heavy Oil Processing, College of Science, China University  
of Petroleum (East China), Qingdao, Shandong, 266580, People's Republic of China.  
[dfsun@upc.edu.cn](mailto:dfsun@upc.edu.cn)

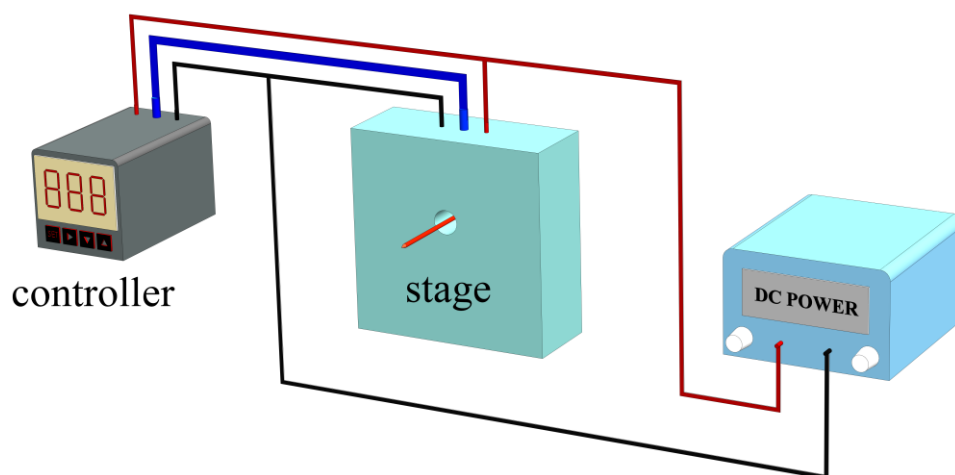

Fig. S1 Schematic of the *in situ* temperature controller stage for transmitting FTIR spectra collection. The blue wire is connected to the K-type thermocouple to measure the sample temperature. The aperture on the stage allows the transmitting of IR beam, which enables the spectra collection.

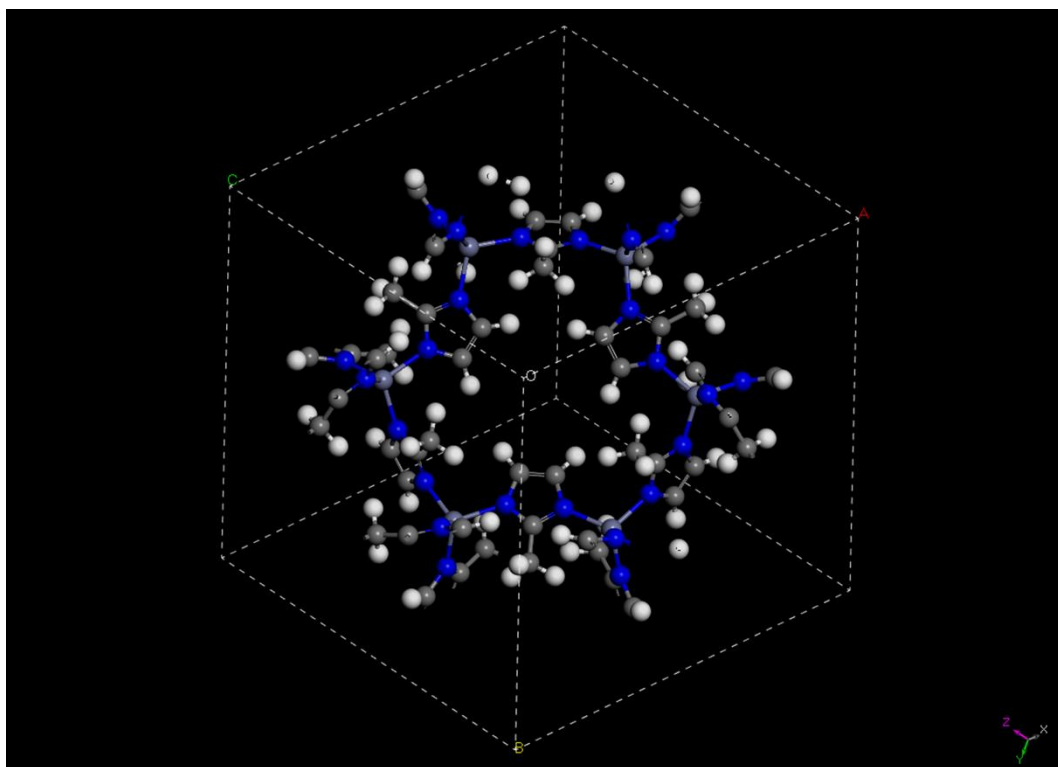

Fig S2 The ZIF-8 crystal model for DFT calculations.

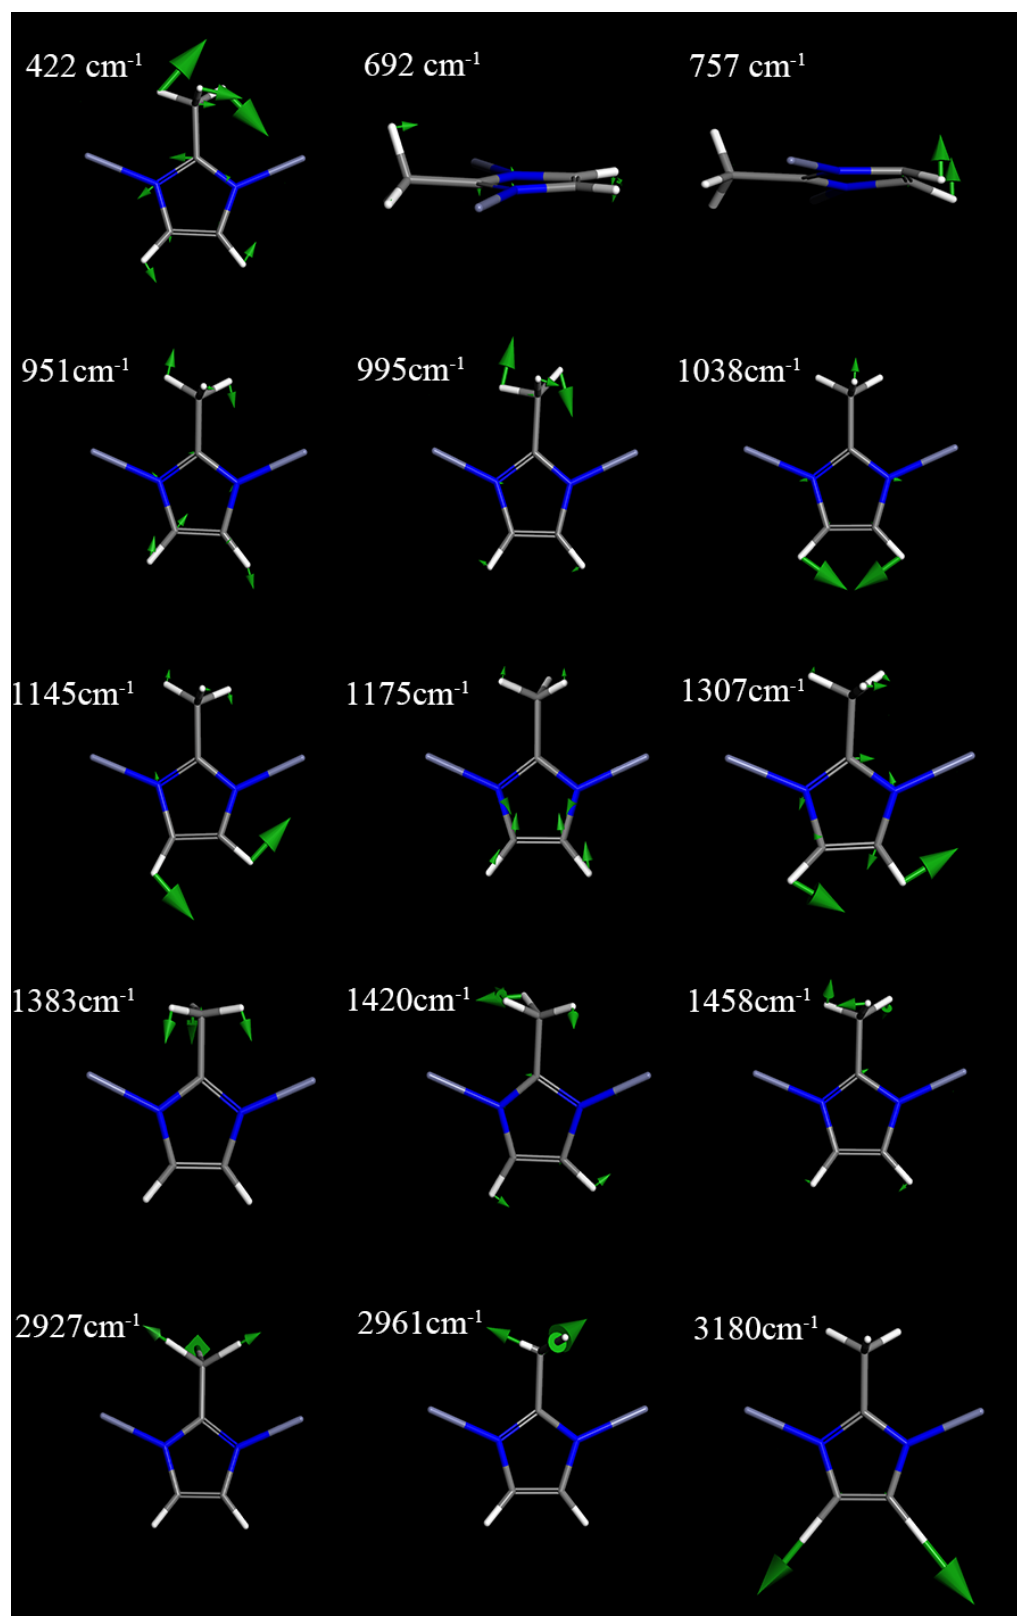

Fig. S3 Details of atomic moieties for each vibration of ZIF-8.

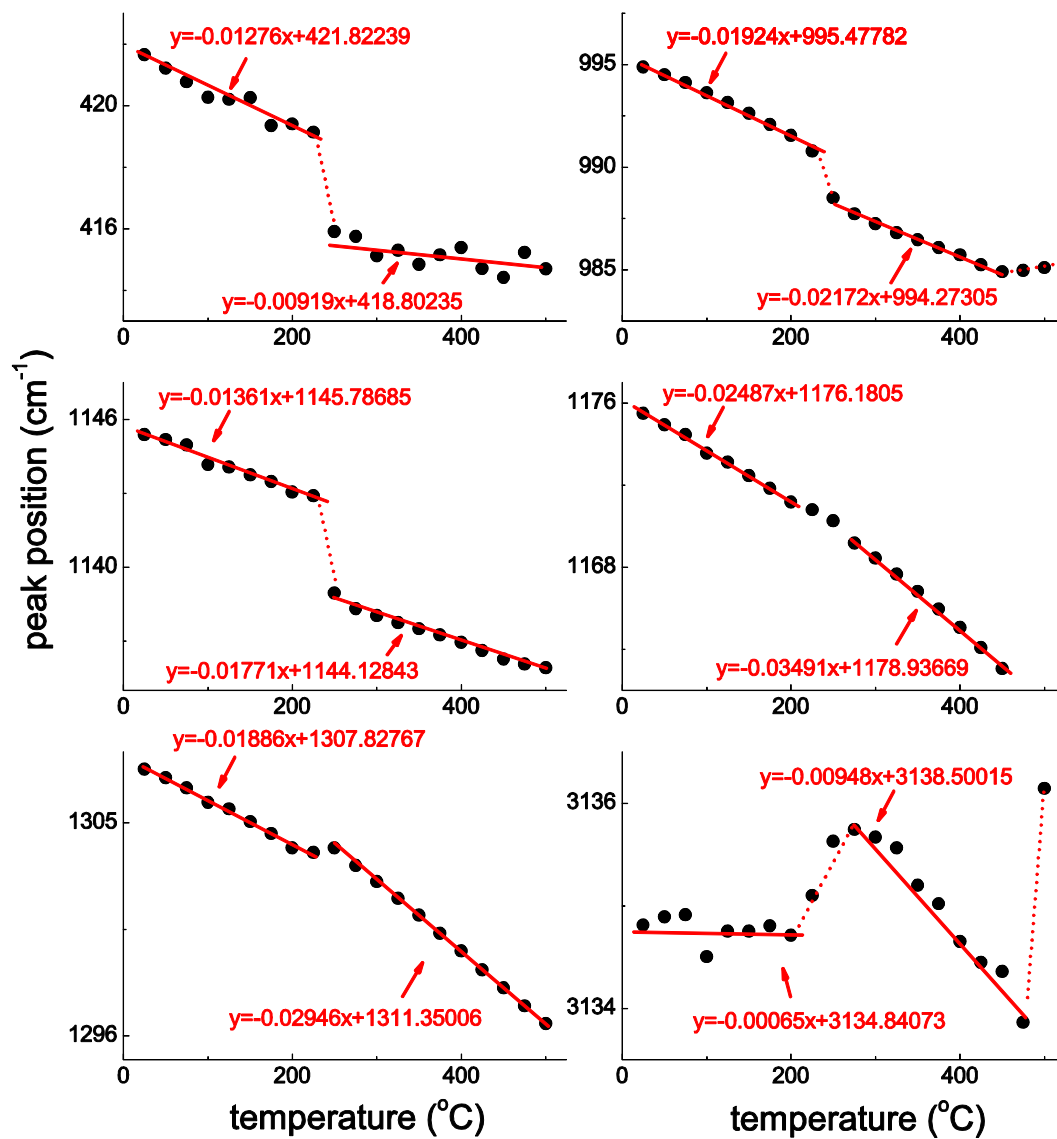

Fig. S4 Peak position changes due to temperature. The linear fitting was applied for each curve.

Table S1 Band assignments of ZIF-8 based on DFT calculations

| Band assignment <sup>a</sup>                  | Exp. (cm <sup>-1</sup> ) | Cal. (cm <sup>-1</sup> ) |
|-----------------------------------------------|--------------------------|--------------------------|
| IP $\delta_{C2-M}$                            | 422                      | 414                      |
| $\delta_{M-H}$ +Ring puckering+OP R-H wagging | 692                      | 667                      |
| OP R-H wagging                                | 757                      | 734                      |
| $\delta_{M-H+VR}$                             | 951                      | 940                      |
| $\delta_{M-H}$ +IP R-H wagging                | 995                      | 981                      |
| $\delta_{M-H+VR}$ +R-H scissoring             | 1038                     | 1011                     |
| $\delta_{M-H+VR}$ +IP R-H wagging             | 1145                     | 1141                     |
| $\delta_{M-H+VR}$                             | 1175                     | 1192                     |
| $\delta_{M-H+VR}$ +IP R-H wagging             | 1307                     | 1308                     |
| Sym. $\delta_{M-H}$                           | 1383                     | 1369                     |
| $\delta_{M-H+VR}$ +IP R-H wagging             | 1420                     | 1403                     |
| $\delta_{M-H+VR}$ +IP R-H wagging             | 1458                     | 1465                     |
| Sym. $\nu_{M-H}$                              | 2927                     | 2951                     |
| Asym. $\nu_{M-H}$                             | 2961                     | 3013                     |
| $\nu_{C-H}$ (R)                               | 3135                     | 3180                     |

Table S2 Fitting results for each peak in the regions below 200°C and above 250°C.

| Peak position<br>(cm <sup>-1</sup> ) | <200°C   |             | >250°C   |             |
|--------------------------------------|----------|-------------|----------|-------------|
|                                      | slope    | y-intercept | slope    | y-intercept |
| 422                                  | -0.01276 | 421.82239   | -0.00919 | 418.80235   |
| 995                                  | -0.01924 | 995.47782   | -0.02172 | 994.27305   |
| 1146                                 | -0.01361 | 1145.78685  | -0.01771 | 1144.12843  |
| 1176                                 | -0.02487 | 1176.1805   | -0.03491 | 1178.93669  |
| 1308                                 | -0.01886 | 1307.82767  | -0.02946 | 1311.35006  |
| 1380                                 | -0.01529 | 1384.70623  | -0.02354 | 1385.89411  |
| 2926                                 | 0.00743  | 2927.27005  | -0.00148 | 2926.76792  |
| 3135                                 | -0.00065 | 3134.84073  | -0.00948 | 3138.50015  |

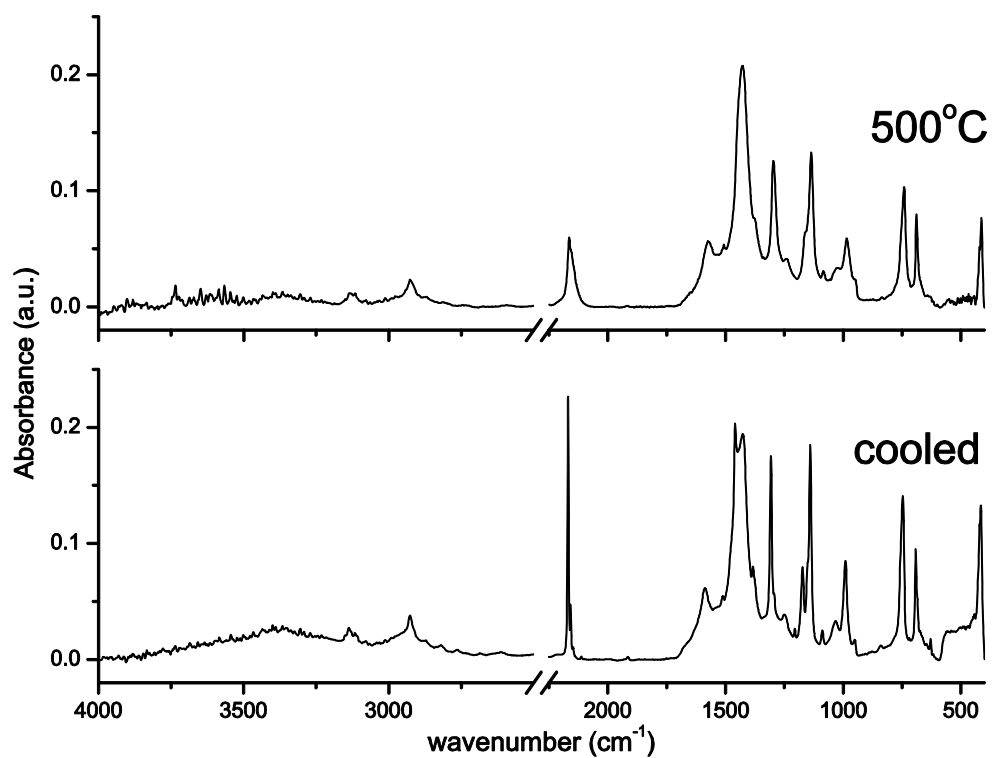

Fig. S5 IR spectra of ZIF-8 under 500 °C and cooled back to 100 °C. The sharp and narrow peak at 2170 cm<sup>-1</sup> is typical for -C≡N vibration.



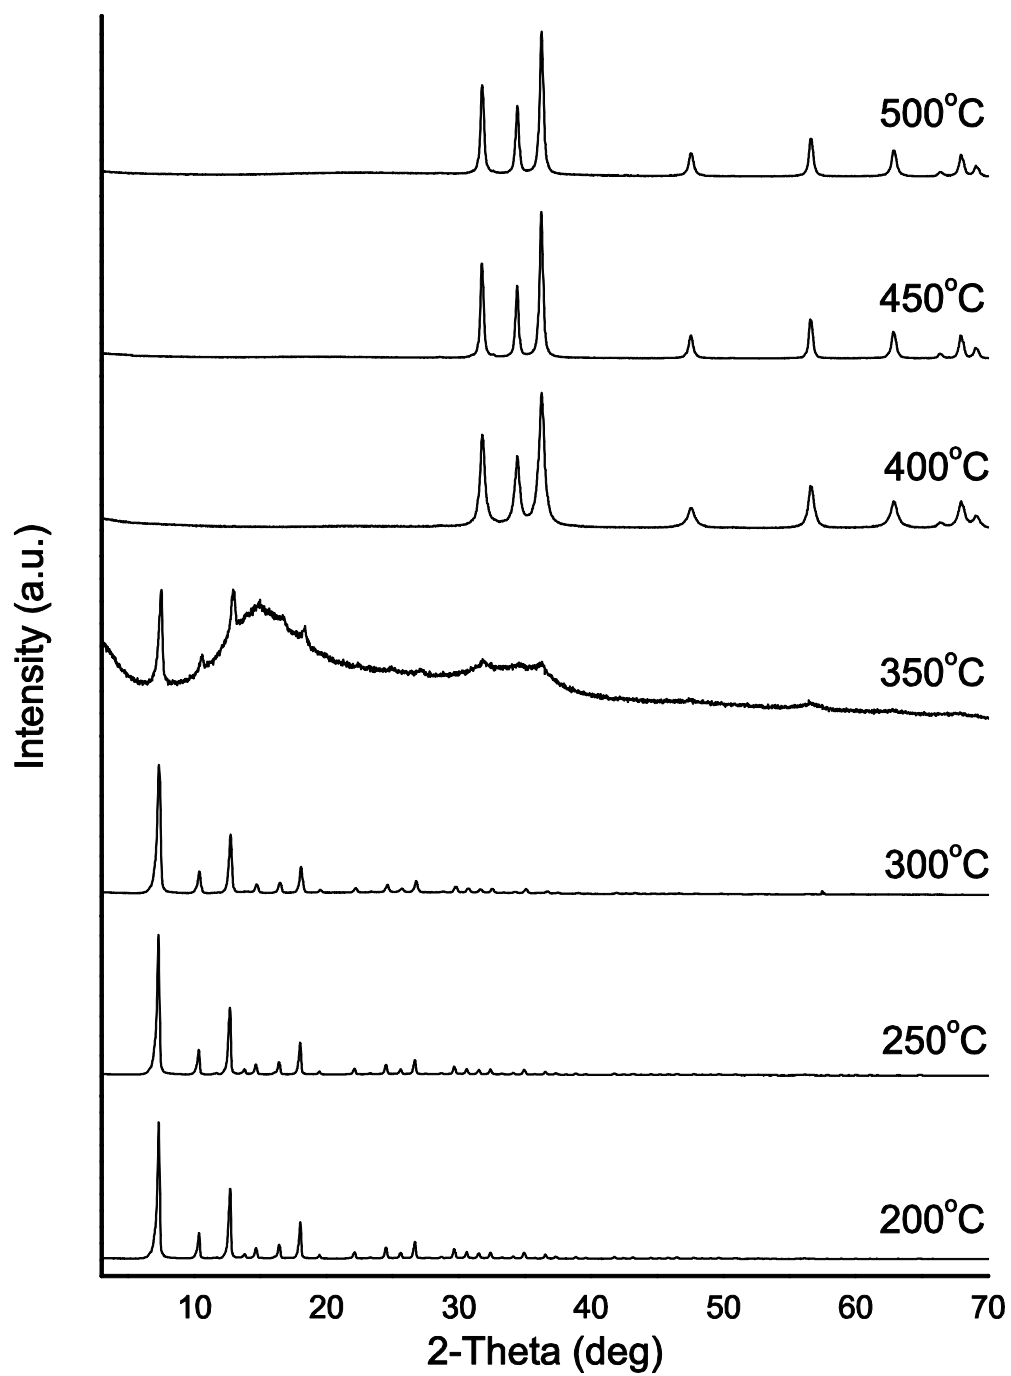

Fig. S6 XRD patterns for ZIF-8 powders heated at different temperatures.
